# Supplementary material
Source: MDPI journal article supplement (https://www.mdpi.com/1996-1073/13/19/5004)
Supplement: s1 [file s1]

# Effects of Porous Structure Development and Ash on the Steam Gasification Reactivity of Biochar Residues from a Commercial Gasifier at Different Temperatures

Saiman Ding, Efthymios Kantarelis and Klas Engvall \*

Department of Chemical Engineering, KTH Royal Institute of Technology, SE-100 44 Stockholm, Sweden;  
saiman@kth.se (S.D.); ekan@kth.se (E.K.)

\* Correspondence: kengvall@kth.se

## Supplementary material

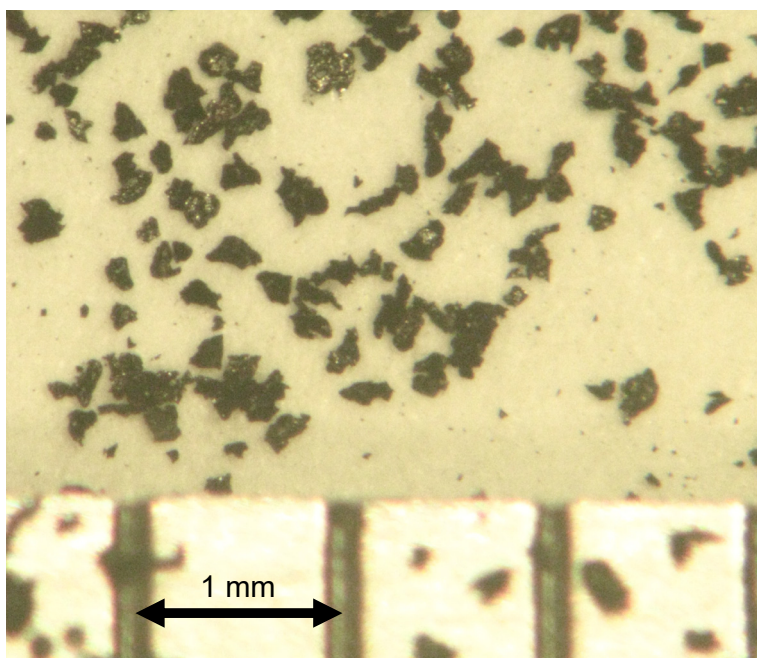

Figure S- 1 Photo of the original biochar used in the experiments.

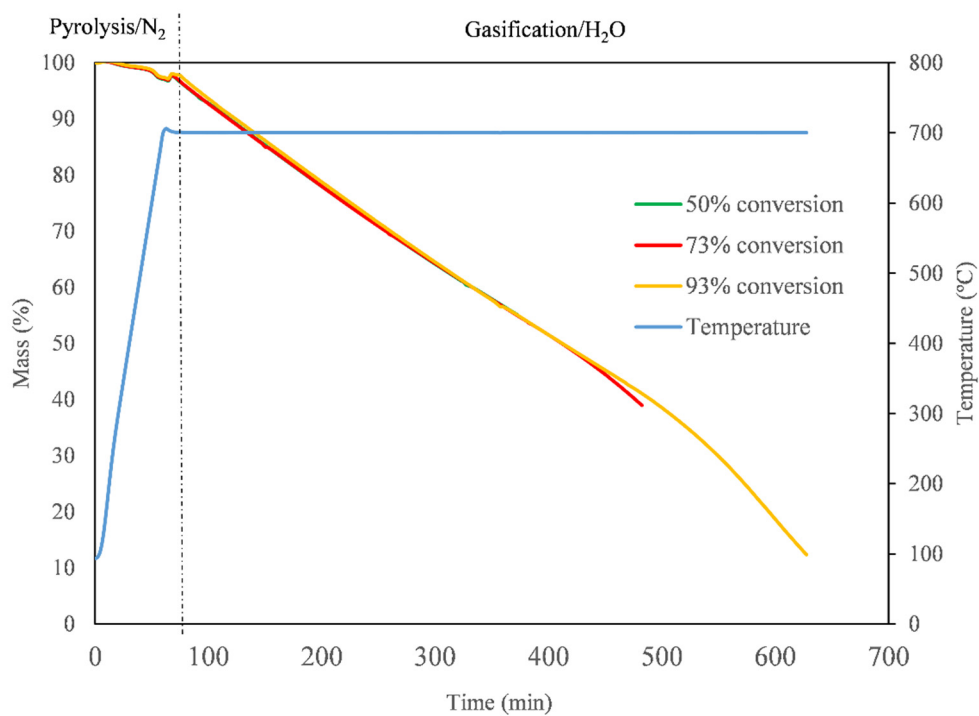

Figure S- 2 Mass loss curves of char versus time and temperature at different conversion rates (gasification temperature 700 °C).

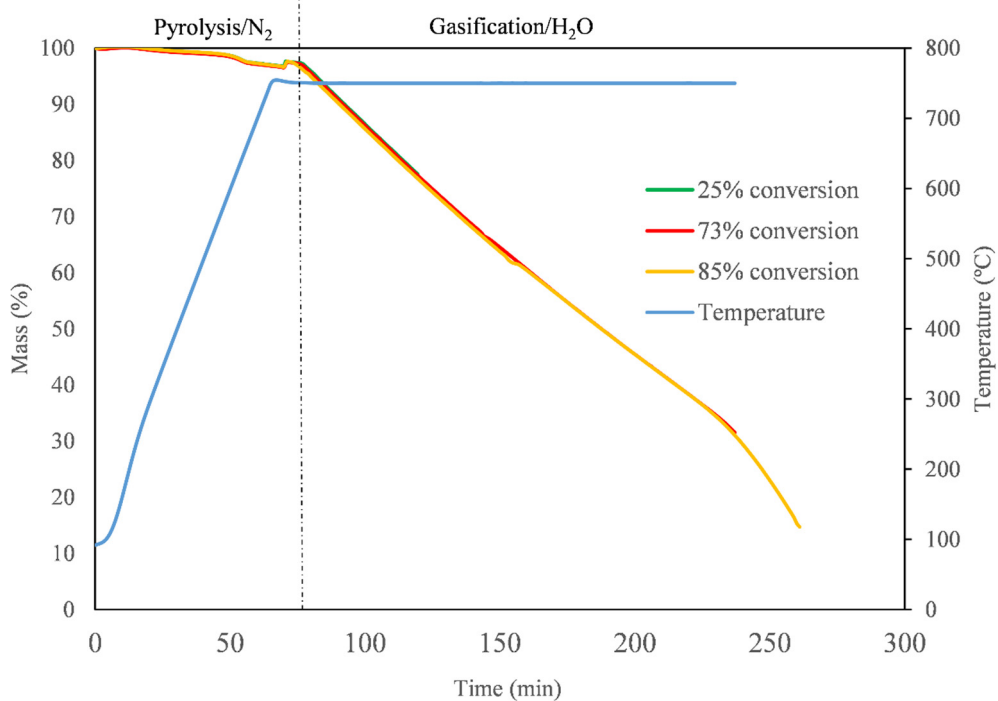

Figure S- 3 Mass loss curves of char versus time and temperature at different conversion rates (gasification temperature 750 °C).

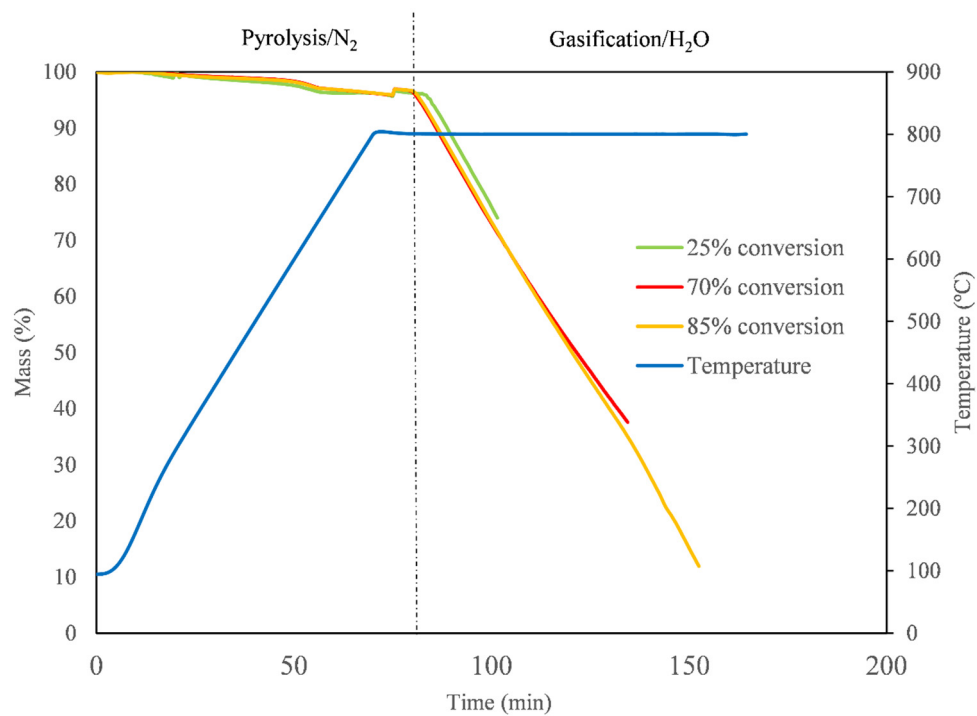

Figure S- 4 Mass loss curves of char versus time and temperature at different conversion rates (gasification temperature 800 °C).

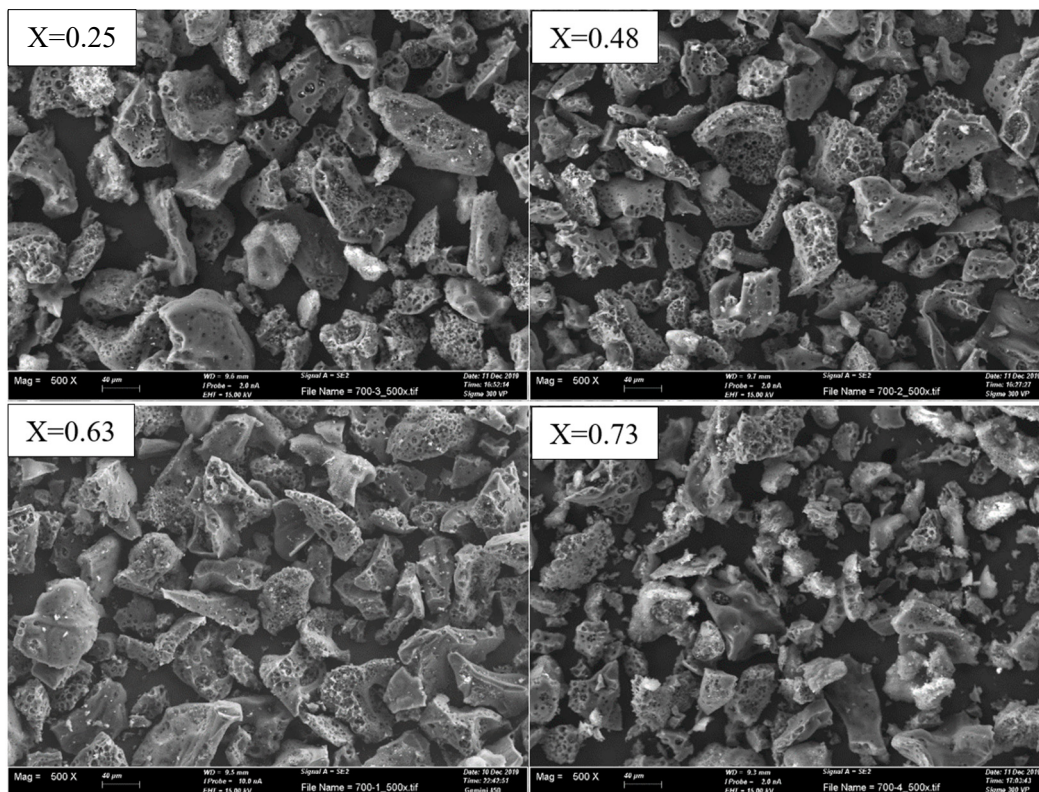

Figure S- 5 SEM images (500×magnification) of char at different carbon conversions in 30% steam at 700 °C.

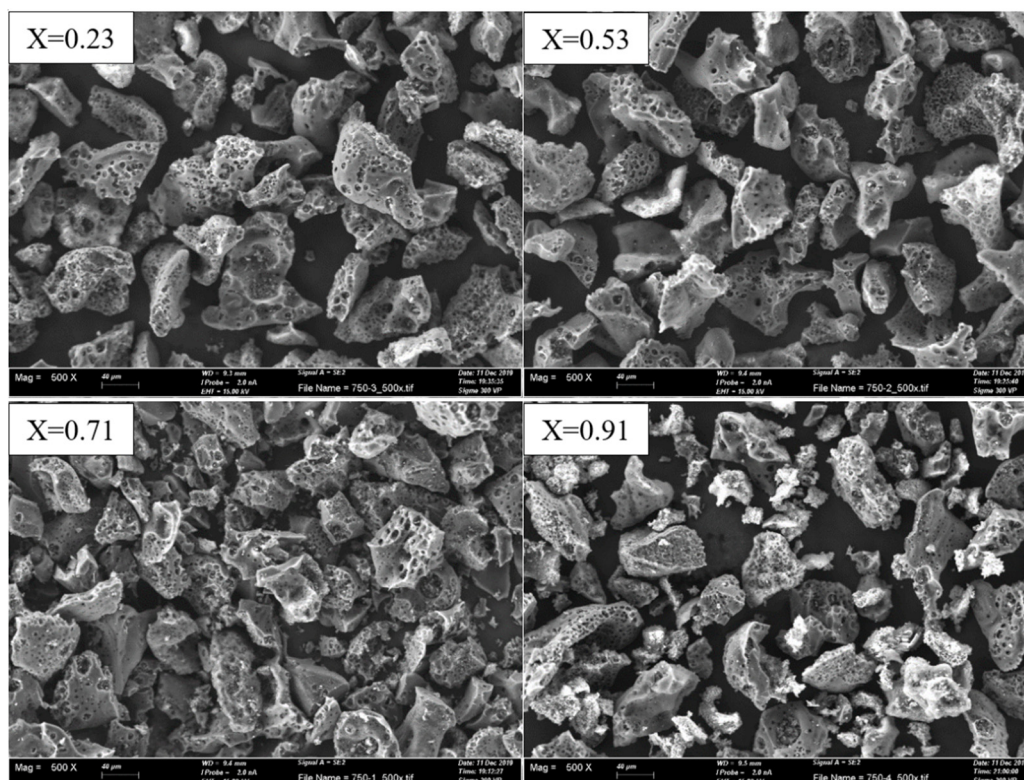

Figure S- 6 . SEM images (500×magnification) of char at different carbon conversions in 30% steam at 750 °C.

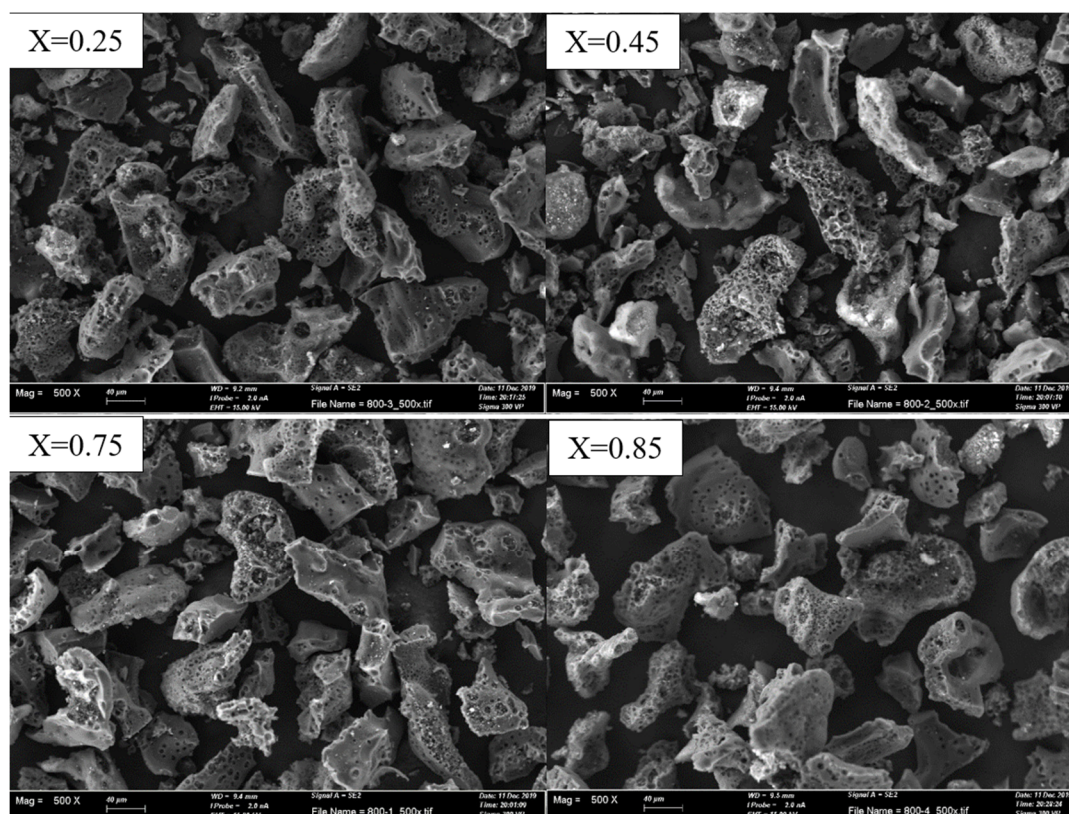

Figure S- 7 SEM images (500×magnification) of char at different carbon conversions in 30% steam at 800 °C.

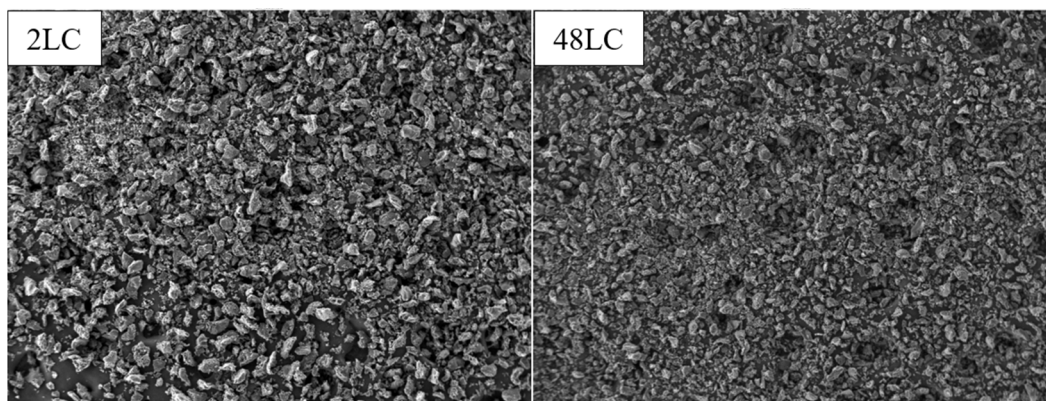

Figure S- 8 . SEM images (100×magnification) of 2LC and 48LC

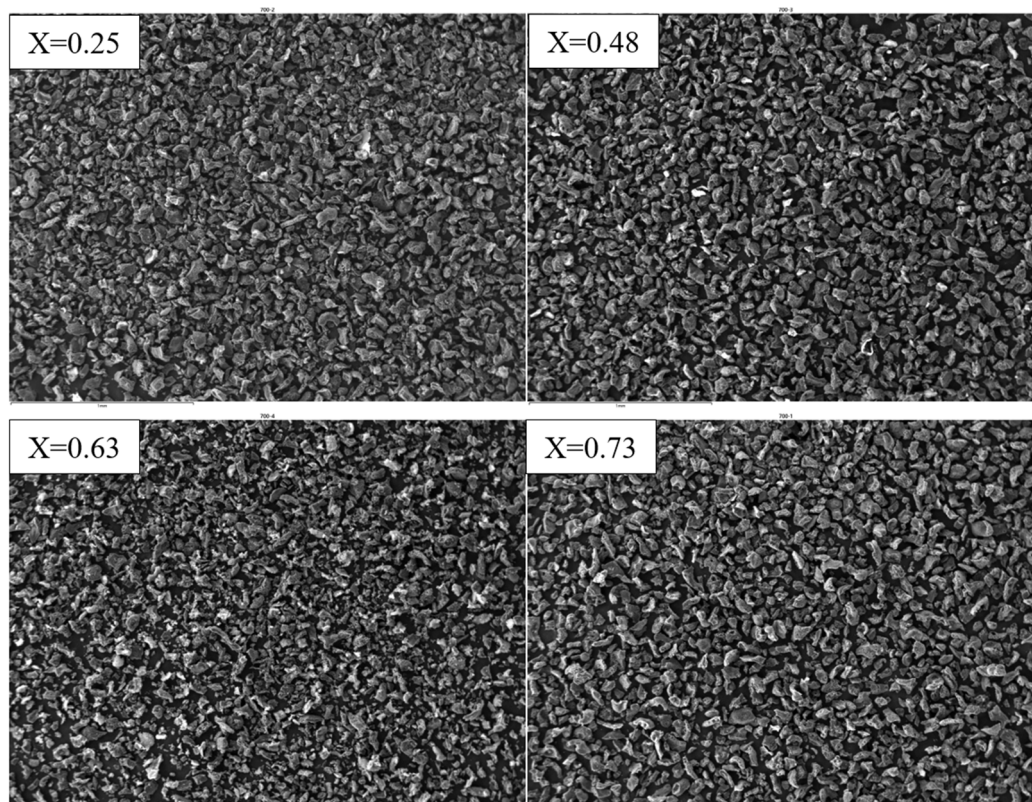

Figure S- 9 SEM images (100×magnification) of char at different carbon conversions in 30% steam at 700 °C.

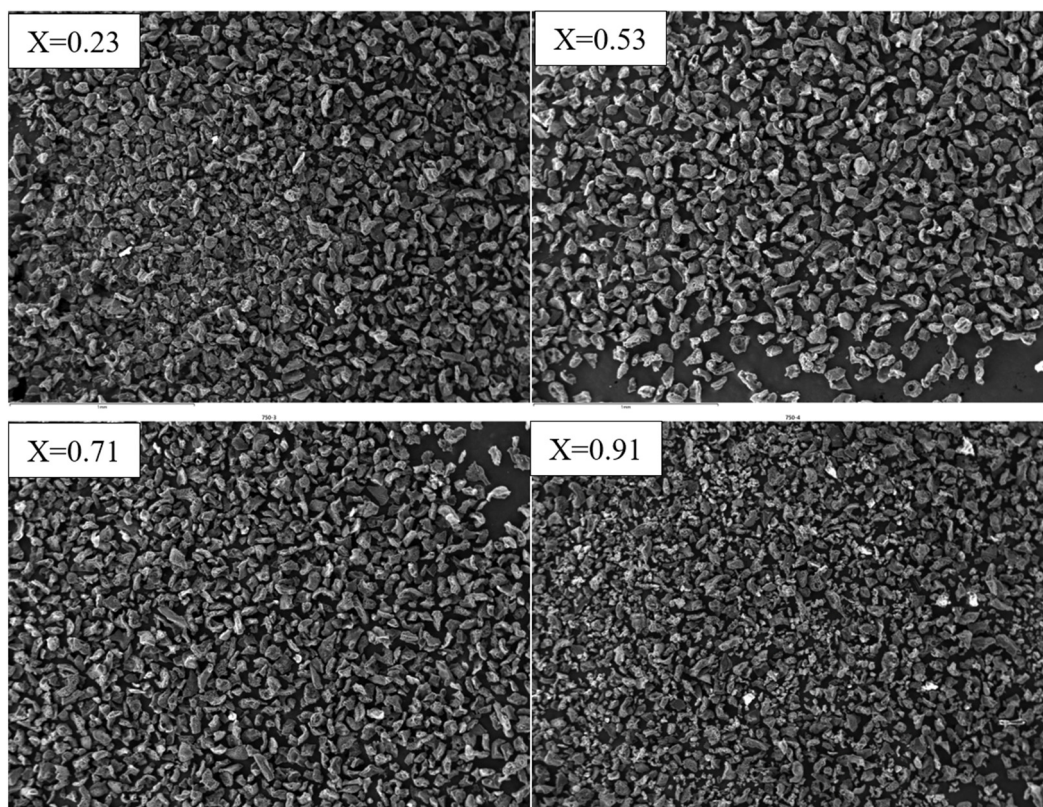

Figure S- 10 SEM images (100×magnification) of char at different carbon conversions in 30% steam at 750 °C.

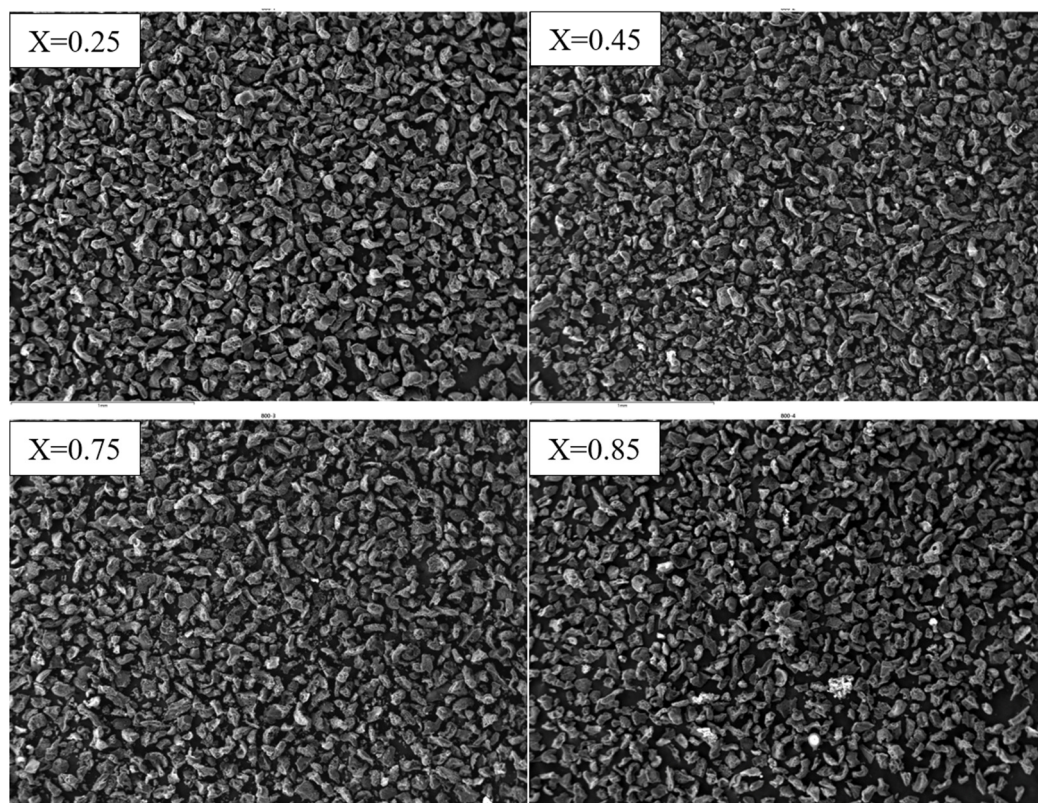

Figure S- 11 SEM images (100×magnification) of char at different carbon conversions in 30% steam at 800 °C.
